# Supplementary material
Source: PubMed Central journal article supplement (PMC3878655)
Supplement: NIHMS540357-supplement-02.pdf [file NIHMS540357-supplement-02.pdf]

## Supplemental Information:

# An anti-inflammatory NOD-like receptor is required for microglia development

Authors: Celia E. Shiau, Kelly R. Monk<sup>†</sup>, William Joo<sup>‡</sup>, and William S. Talbot\*

Affiliation: Department of Developmental Biology, Stanford University,  
Stanford, CA 94305

\*Correspondence to: [william.talbot@stanford.edu](mailto:william.talbot@stanford.edu).

<sup>†</sup> Present address: Department of Developmental Biology, Washington  
University School of Medicine, St. Louis, MO 63110

<sup>‡</sup>Present address: Neuroscience Program, Department of Biology, Stanford  
University, Stanford, CA 94305

This file contains:

Figures S1–S5 and Table S1

Movies S1–S8 legends

Extended Experimental Procedures

Supplemental References

**Supplemental Figures and Table**

Figure S1:

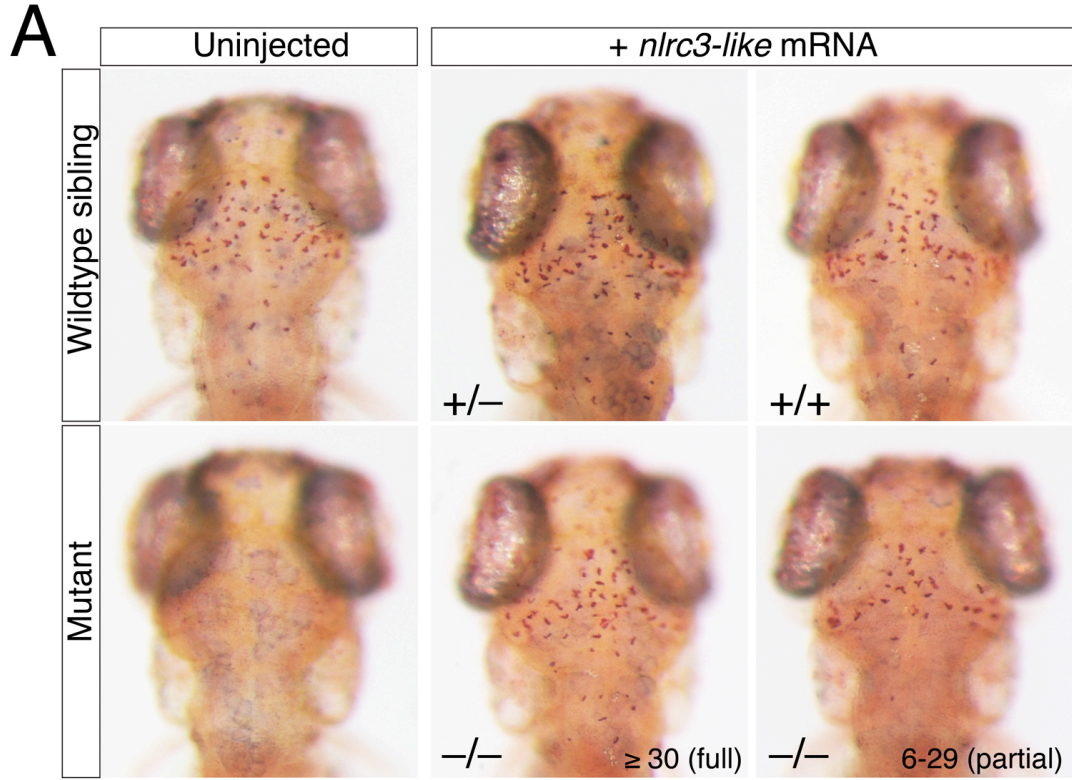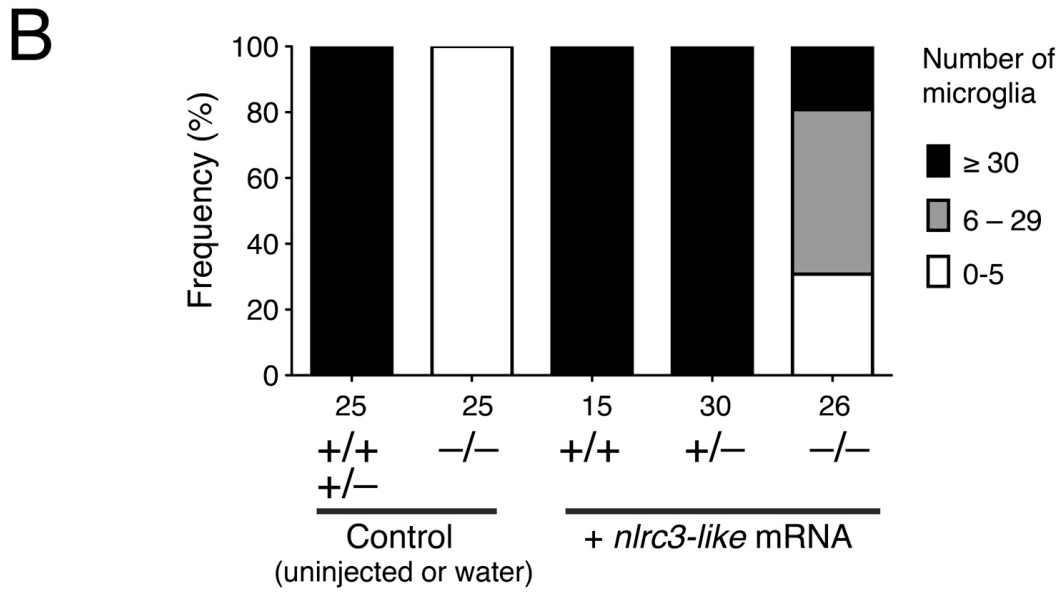

Figure S1. Injection of full-length wildtype *nirc3-like* mRNA can fully rescue microglia in *nirc3-like*<sup>-/-</sup> mutants, Related to Figure 1.

**(A)** Images of embryos injected with synthetic *nirc3-like* mRNA at the 1-4 cell stage and uninjected controls. At 4–5 dpf, neutral red staining showed that introduction of synthetic *nirc3-like* mRNA can fully ( $\geq 30$  microglia) or partially (6–29 microglia) rescue the *nirc3-like* mutants; there was no change in microglia formation in injected heterozygous or wildtype siblings. Dorsal views; anterior to the top. **(B)** Graph showing frequency of the different classes of microglia number (0–5, 6–29, or  $\geq 30$  microglia) in the indicated genotypes in control (uninjected or water injected) and *nirc3-like* mRNA injected groups. Number below bar graph represents n, number of embryos analyzed.

Figure S2:

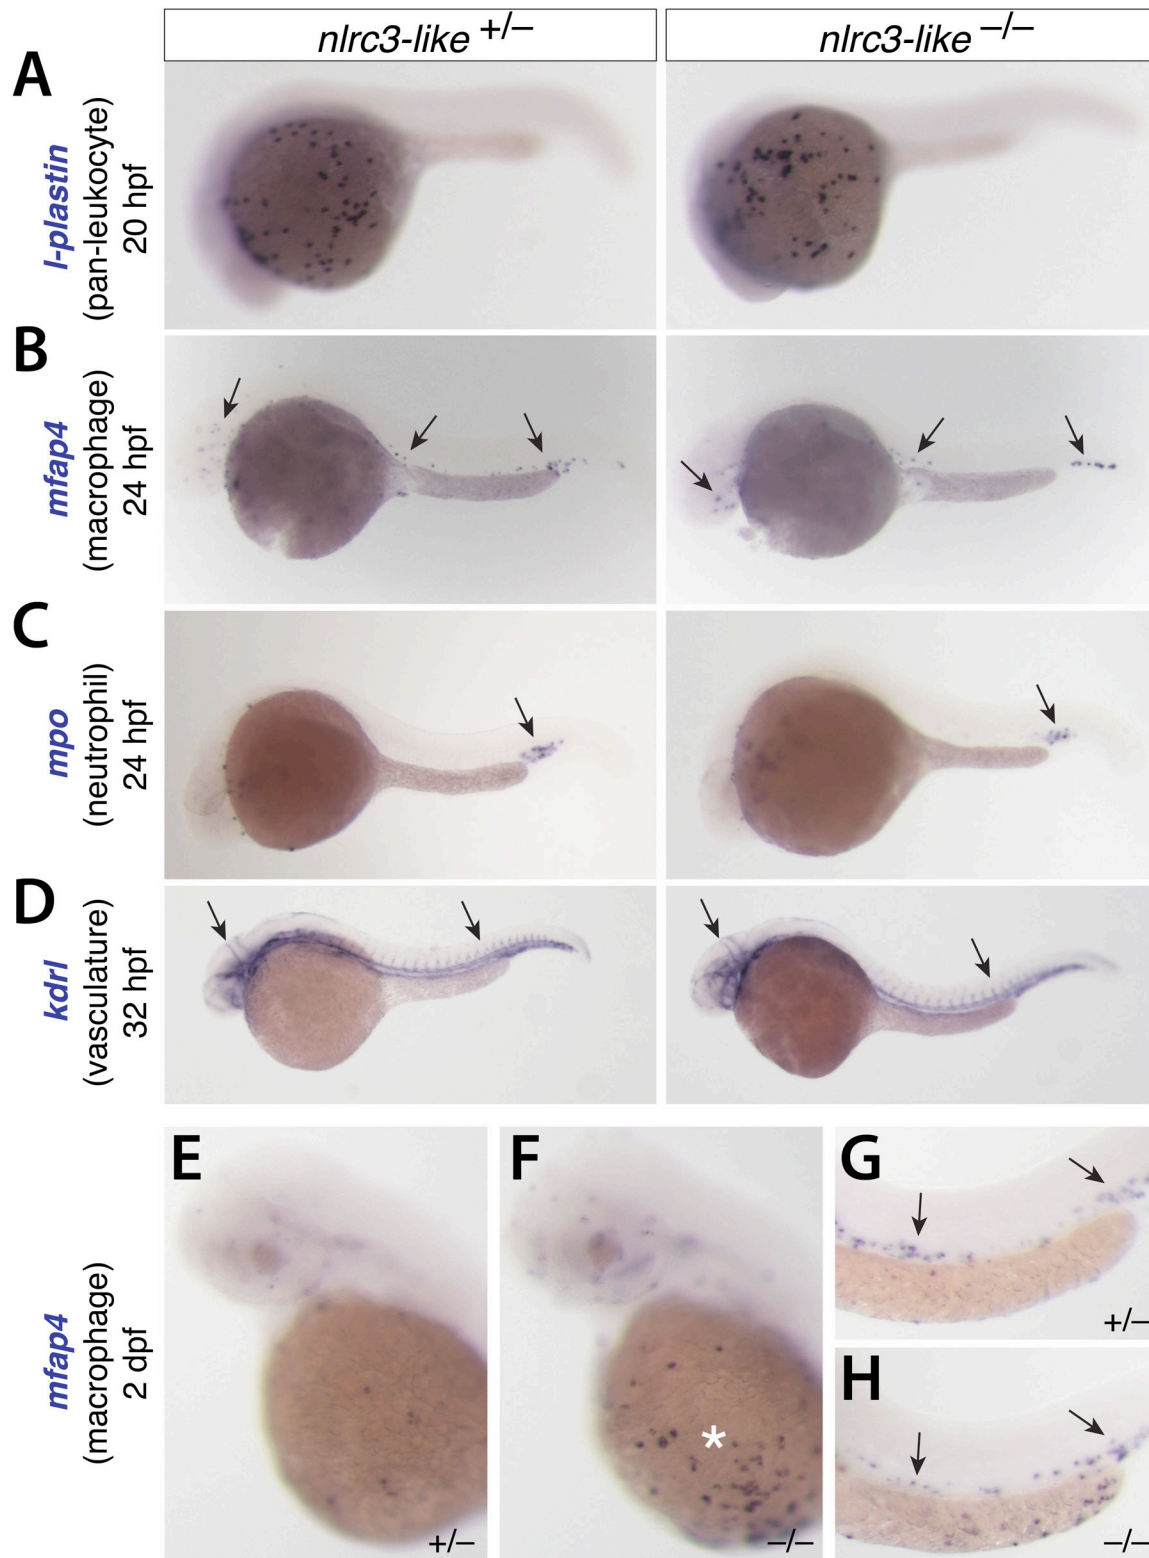



Figure S2. Early formation of primitive macrophages, neutrophils, and the vasculature appear normal in *nirc3-like*<sup>-/-</sup> mutants, Related to Figure 2.

The images show embryos analyzed by whole mount in situ hybridization. **(A)** At 20 hpf there was no apparent difference in expression in *l-plastin*, a marker of all leukocytes. **(B)** At 24 hpf, *mfap4* expression indicated normal formation and migration of primitive macrophages into the embryo proper in mutants and siblings (arrows). **(C)** At 24 hpf, *mpo* expression showed no difference (arrow) between mutants and siblings. **(D)** Vasculature formed normally in the mutants, based on the expression pattern of the endothelial marker *kdrl* at 32 hpf (arrows). **(E-H)** *mfap4* expression at 2 dpf shows the abundance of macrophages in the periphery of *nirc3-like* mutants. Compared with heterozygous siblings **(E)**, mutants **(F)** have abnormal aggregations of macrophages in the yolk sac (asterisk), but similar pattern of macrophages in the caudal vein **(G-H)**, arrows). All panels show lateral views, with anterior to the left and dorsal to the top.

Figure S3:

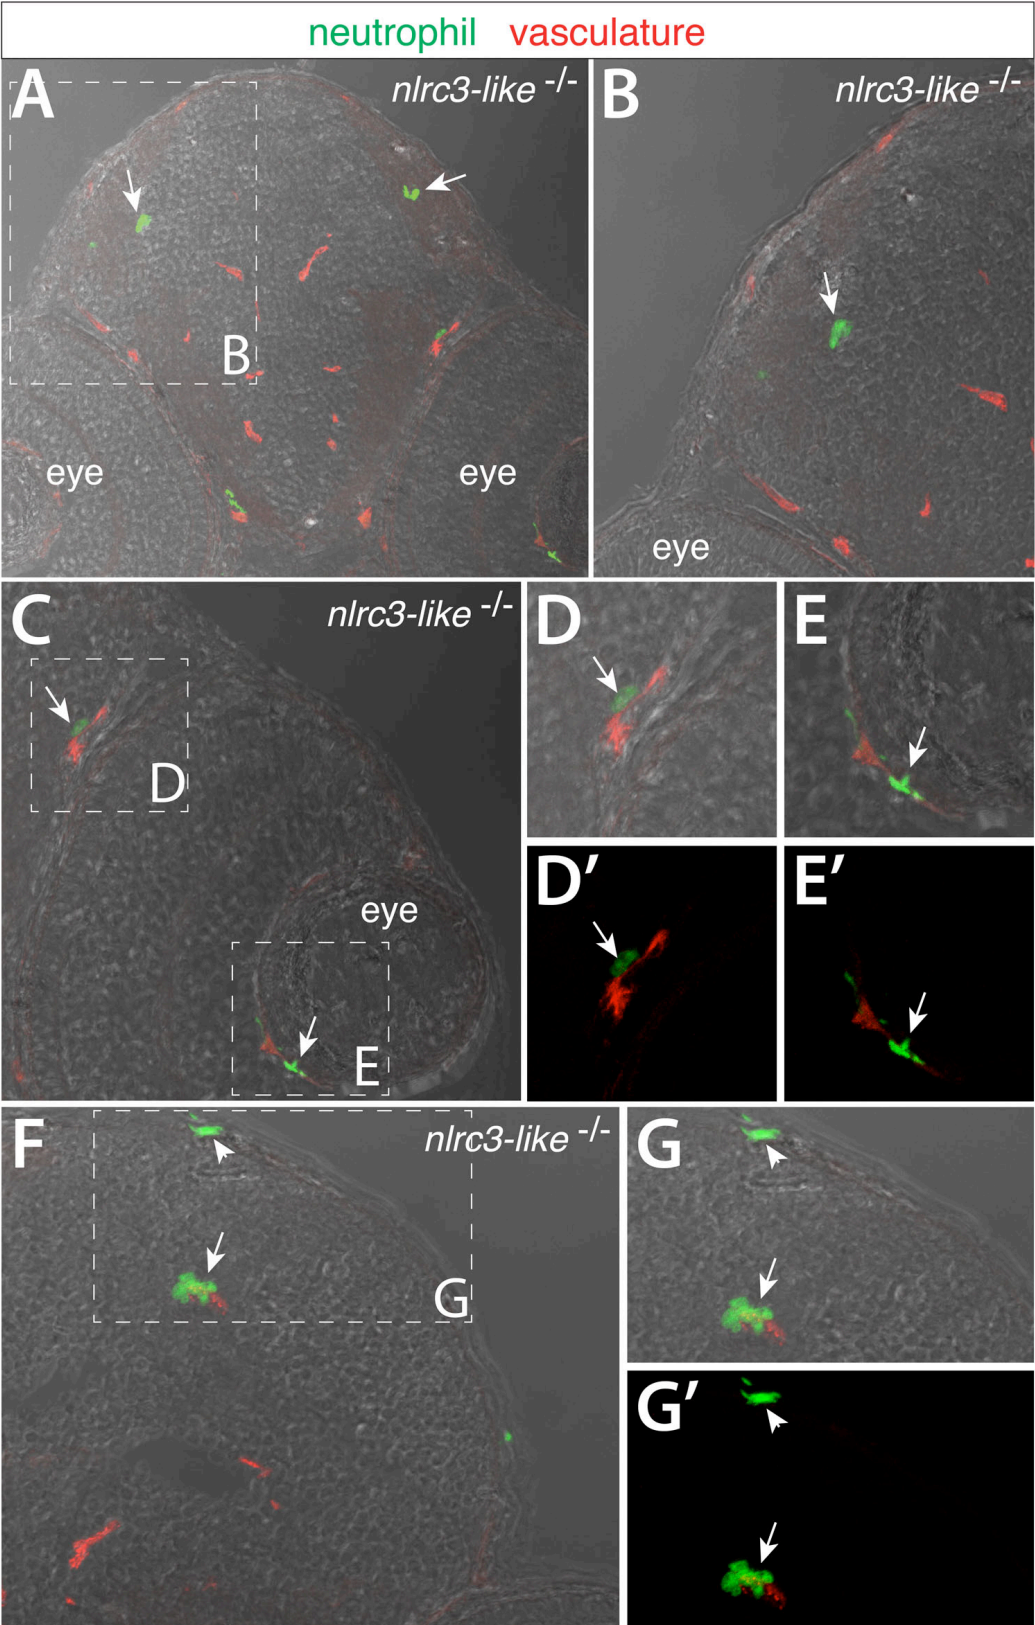

Figure S3. Transverse sections through the head of *nlr3-like*<sup>-/-</sup> embryos at 2.5 dpf show neutrophils that have infiltrated the brain parenchyma and other locations, Related to Figure 4.

Cryosections through the head of double transgenic *nlr3-like* mutant embryos labeled by neutrophil reporter *lyz:EGFP* and vasculature marker *kdrl:mCherry-CAAX*. Images show overlay of GFP and mCherry expression on the bright field image. **(A)** In *nlr3-like* mutants, *lyz:EGFP* + neutrophils are found intermixed with cells in the brain parenchyma independent of the vasculature in red (arrows). **(B)** Higher magnification of **A** as demarcated by the white dotted box. Neutrophils in the mutant are also often found within or surrounding eye vasculature **(C-E)**. **(D-E)** Higher magnification of the boxed regions in **C**. **(D'-E')** Red and green fluorescent overlay of the same image as **D-E** respectively. **(F-G)** Neutrophils are also associated with brain vessels (arrow) and in or near the dorsal head epithelium (arrowhead).

Figure S4:

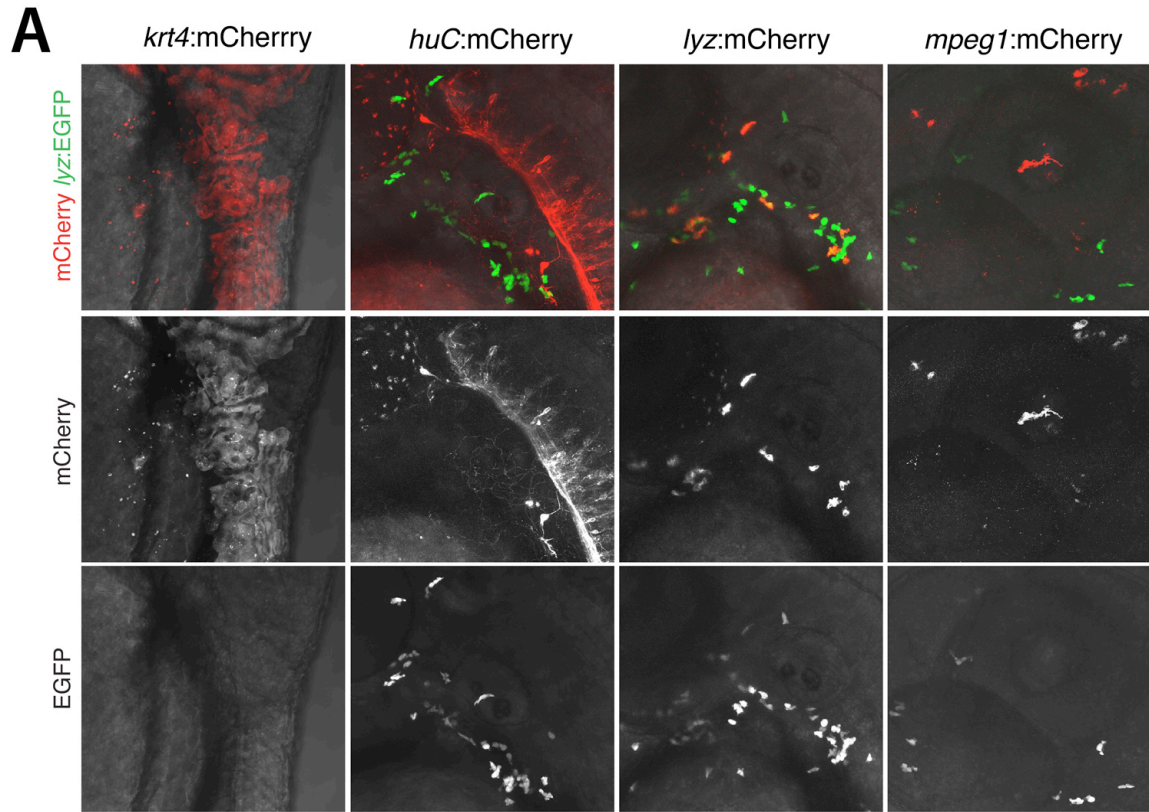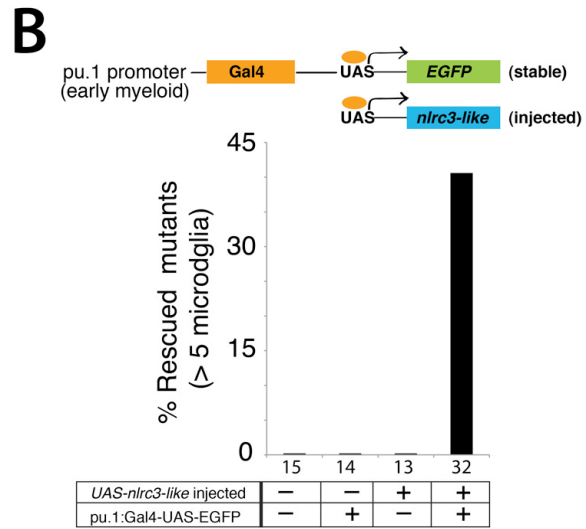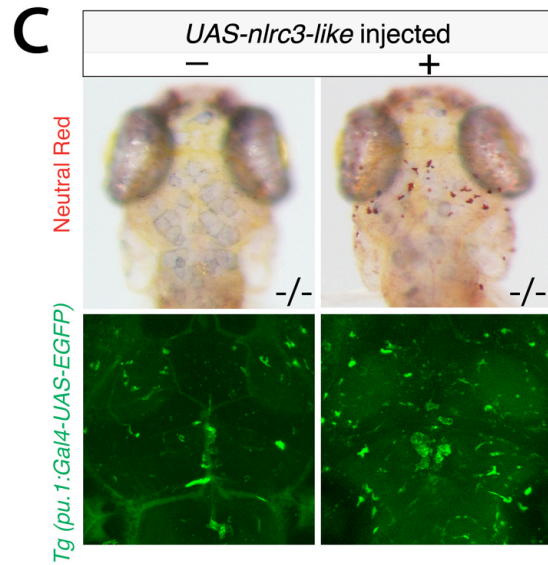

Figure S4. Tissue-specific promoter constructs drive expression in a tissue restricted manner; restoring *nlr3-like* expression using the myeloid *pu.1* driver rescues microglia in *nlr3-like*<sup>-/-</sup> mutants, Related to Figure 5.

**(A)** Top row, merged images showing *lyz:EGFP* stable transgene expression that marks neutrophils and control mCherry expression under the control of different tissue promoters as indicated at 2 dpf. Neutrophil reporter *lyz:EGFP* provides a reference to indicate the locations where leukocytes normally reside, and to distinguish the neutrophil *lyz* promoter from the macrophage *mpeg1* driver. Top row, merged images of mCherry and EGFP expression; middle row, mCherry expression only from the construct injected; bottom row, stable neutrophil transgene *lyz:EGFP* expression only. **(B)** Schematic showing the Gal4/UAS system applied to drive *nlr3-like* in early myeloid cells under the control of the *pu.1* promoter. Bar graph showing that 41% of mutants having both the *pu.1: Gal4-UAS-EGFP* driver and *UAS-nlr3-like* construct are rescued, with > 5 microglia. There was no rescue in mutants missing at least one component of the Gal4/UAS system for *nlr3-like* expression. **(C)** Representative images showing rescue of a 4 dpf mutant using the Gal4/UAS system (right). Top row, neutral red staining to visualize microglia, and bottom row, images showing *UAS-GFP* expression in the same larvae as above, indicating robust activity of the *pu.1:Gal4* driver. Number below bar graph represents n, number of mutants analyzed.

Figure S5:

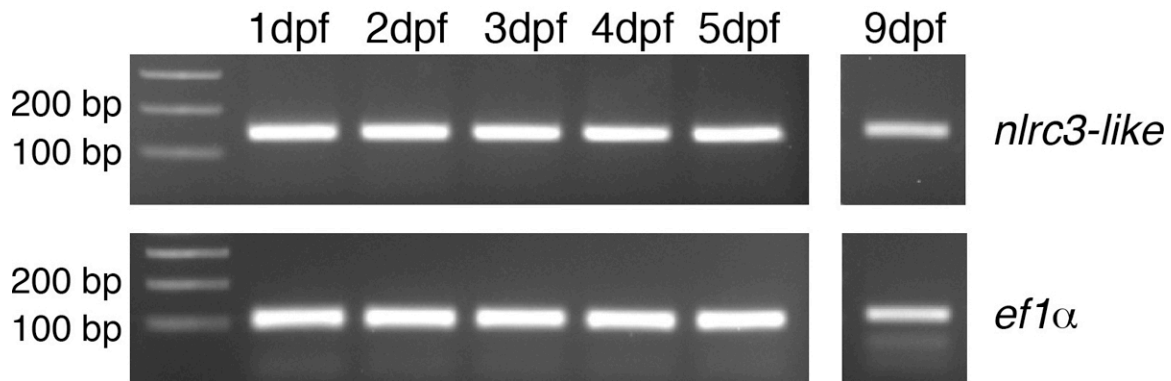

Figure S5. *nlrc3-like* mRNA is expressed throughout embryogenesis and larval development from 1 dpf to 9 dpf, Related to Figure 5. RT-PCR of pooled embryos at 1–5 dpf and individual larvae at 9 dpf show expression of *nlrc3-like* and, as a control, *ef1α*.

Table S1:

| <b>A</b> | <b>Primers for qPCR or RT-PCR</b> | <b>B</b> | <b>Primers for Gateway cloning</b>                 |
|----------|-----------------------------------|----------|----------------------------------------------------|
|          | <i>ef1a</i>                       |          | <i>huC</i> promoter                                |
| F        | AGGACATCCGTCGTGGTAAT              | F        | ggggacaacttgatagaaaagtgtctGAATTCATAATTTGAATTTA     |
| R        | AGAGATCTGACCAGGGTGGTT             | R        | ggggactgctttttgtacaaaactgcTCTTGACGTACAAAGATGATA    |
|          | <i>b-actin</i>                    |          | <i>krt4</i> promoter                               |
| F        | GAGATGATGCCCCCTCGTG               | F        | ggggacaacttgatagaaaagtgtctCCTTCCCTTCTACTTTTGACGTCC |
| R        | CTGAGCCTCATCTCCACAT               | R        | ggggactgctttttgtacaaaactgcCCGGATCCTGTGTCTTTGAGTTGC |
|          | <i>il-1b</i>                      |          | <i>lyz</i> promoter                                |
| F        | GCCTGTGTGTTTGGGAATCT              | F        | ggggacaacttgatagaaaagtgtctGCCATACATTTGATTAGAAG     |
| R        | TGATAAACCAACCGGGACA               | R        | ggggactgctttttgtacaaaactgcTGTATCACTGCTGATATCTG     |
|          | <i>il-8</i>                       |          | <i>mpeg1</i> promoter                              |
| F        | AGCTTGAG GGTCTGGCTGTAGA           | F        | ggggacaacttgatagaaaagtgtctTTGGAGCACATCTGACATC      |
| R        | GCGTCGGCTTTCTGTTTCA               | R        | ggggactgctttttgtacaaaactgcTTGCTGTCTCCTGCACATAATGTG |
|          | <i>il-12a</i>                     |          | mCherry-CAAX                                       |
| F        | AGCAGGACTTGTGCTGGT                | F        | GCCGCCACCATGGTGAGCAAGGGCGAG                        |
| R        | TCCACTGCGCTGAAGTTAGA              | R        | TCAGGAGAGCACACACTT                                 |
|          | <i>tnfa</i>                       |          | <i>nlrc3-like</i>                                  |
| F        | GCGCTTTTCTGAATCCTACG              | F        | GCCACCATGAGCAATTTGCTGAAG                           |
| R        | TGCCAGTCTGTCTCCTTCT               | R        | TTCTCCTCATCTCCTGACCTC                              |
|          | <i>il-10</i>                      |          |                                                    |
| F        | ATTTGTGGAGGGCTTTCCTT              |          |                                                    |
| R        | AGAGCTGTTGGCAGAATGGT              |          |                                                    |
|          | <i>nlrc3-like</i>                 |          |                                                    |
| F        | CAACATACACACACCGCCTT              |          |                                                    |
| R        | TCGTGGCGTAGTTCCTTCTTG             |          |                                                    |

Table S1. Primers used for qPCR, RT-PCR, and Gateway multi-site cloning, Related to Experimental Procedures.

(A) Primers used for the qPCR or RT-PCR experiments to examine mRNA levels of various genes are listed. Primer sequences for *il-1 $\beta$*  (Lopez-Munoz et al., 2009), *il-8* (Oehlers et al., 2010), *il-12a* (Lopez-Munoz et al., 2009), *tnf $\alpha$*  (Lopez-Munoz et al., 2009), and *il-10* (Lopez-Munoz et al., 2009) have been previously published. (B) Primer sequences used to isolate different gene promoters, and coding sequences of *mCherry-CAAX* and *nlrc3-like* are shown. Lower case indicates the adaptor sequences required for Gateway cloning.
